# Supplementary material for: Fully automated expansion and activation of clinical-grade natural killer cells for adoptive immunotherapy
Source: PubMed Central journal article supplement — Cytotherapy. Author manuscript; Available in PMC 2022 Jan 4. (PMC8725994; doi:10.1016/j.jcyt.2015.03.611), 2015-05
Supplement: NIHMS1730825-supplement-1.pdf [file NIHMS1730825-supplement-1.pdf]

**Supplementary table 1** Ingenuity functional grouping analysis derived genes associated with movement of leukocytes among differentially regulated genes after automated NK cell expansion in comparison to manual expansion. Both expansion methods utilized EBV-LCL feeder cells.

| <b>ID</b>     | <b>Genes in dataset</b> | <b>Prediction<br/>(based on expression direction)</b> | <b>Fold Change</b> | <b>Findings</b> |
|---------------|-------------------------|-------------------------------------------------------|--------------------|-----------------|
| A_24_P766716  | CMKLR1                  | Increased                                             | 4,036              | Increases (7)   |
| A_23_P131676  | ACKR3                   | Increased                                             | 3,436              | Increases (2)   |
| A_33_P3298159 | PTGDS                   | Increased                                             | 3,328              | Increases (2)   |
| A_23_P145024  | ADRB2                   | Decreased                                             | 3,188              | Decreases (1)   |
| A_23_P407565  | CX3CR1                  | Increased                                             | 2,872              | Increases (6)   |
| A_23_P129786  | SREBF1                  | Increased                                             | 2,773              | Increases (1)   |
| A_23_P67932   | CXCR1                   | Increased                                             | 2,588              | Increases (15)  |
| A_23_P107744  | S1PR5                   | Increased                                             | 2,526              | Increases (2)   |
| A_23_P89249   | ERBB2                   | Increased                                             | 2,477              | Increases (4)   |
| A_24_P941359  | FAM65B                  | Decreased                                             | 2,445              | Decreases (2)   |
| A_33_P3353921 | GNLY                    | Increased                                             | 2,232              | Increases (11)  |
| A_23_P156683  | LTA                     | Decreased                                             | -2,159             | Increases (12)  |
| A_24_P382319  | CEACAM1                 | Decreased                                             | -2,417             | Increases (4)   |
| A_23_P210210  | EPAS1                   | Affected                                              | -2,424             | Affects (1)     |
| A_33_P3354935 | CSF1                    | Decreased                                             | -3,211             | Increases (24)  |
| A_33_P3265739 | PTGER3                  | Decreased                                             | -3,603             | Increases (1)   |
