# Supplementary material for: Fully automated expansion and activation of clinical-grade natural killer cells for adoptive immunotherapy
Source: PubMed Central journal article supplement — Cytotherapy. Author manuscript; Available in PMC 2022 Jan 4. (PMC8725994; doi:10.1016/j.jcyt.2015.03.611), 2015-05
Supplement: NIHMS1730825-supplement-2.pdf [file NIHMS1730825-supplement-2.pdf]

**Supplementary table 2** 100 most down-regulated genes after automated NK cell expansion in comparison to freshly isolated NK cells.

|    | Fold Change | Gene                | Tukey p value | Location            |
|----|-------------|---------------------|---------------|---------------------|
| 1  | -5507,077   | FCN1                | <2.22e-16     | Extracellular Space |
| 2  | -5219,384   | MAFB                | <2.22e-16     | Nucleus             |
| 3  | -2369,670   | GRASP               | <2.22e-16     | Plasma Membrane     |
| 4  | -1079,390   | NLRP3               | <2.22e-16     | Cytoplasm           |
| 5  | -940,743    | SULF2               | <2.22e-16     | Plasma Membrane     |
| 6  | -837,497    | HES4                | <2.22e-16     | Other               |
| 7  | -797,810    | HBA1/HBA2           | <2.22e-16     | Extracellular Space |
| 8  | -782,670    | JDP2                | <2.22e-16     | Nucleus             |
| 9  | -660,890    | SPON2               | <2.22e-16     | Extracellular Space |
| 10 | -627,402    | CSF3R               | <2.22e-16     | Plasma Membrane     |
| 11 | -608,718    | SERPINA1            | <2.22e-16     | Extracellular Space |
| 12 | -586,274    | HOMER3              | <2.22e-16     | Plasma Membrane     |
| 13 | -572,867    | HBA1/HBA2           | <2.22e-16     | Extracellular Space |
| 14 | -532,934    | FPR1                | <2.22e-16     | Plasma Membrane     |
| 15 | -484,201    | FCRL6               | <2.22e-16     | Plasma Membrane     |
| 16 | -441,897    | WDFY4               | <2.22e-16     | Other               |
| 17 | -434,456    | ALOX5               | <2.22e-16     | Cytoplasm           |
| 18 | -422,755    | ADM                 | <2.22e-16     | Extracellular Space |
| 19 | -421,631    | G0S2                | <2.22e-16     | Cytoplasm           |
| 20 | -396,325    | SPI1                | <2.22e-16     | Nucleus             |
| 21 | -359,103    | TGFBI               | <2.22e-16     | Extracellular Space |
| 22 | -355,679    | CFP                 | <2.22e-16     | Extracellular Space |
| 23 | -280,306    | IL1RN               | <2.22e-16     | Extracellular Space |
| 24 | -260,049    | SMARCD3             | <2.22e-16     | Nucleus             |
| 25 | -246,025    | KCNQ1               | <2.22e-16     | Plasma Membrane     |
| 26 | -240,621    | CYP27A1             | 1,31E-04      | Cytoplasm           |
| 27 | -237,955    | CSF1R               | <2.22e-16     | Plasma Membrane     |
| 28 | -215,466    | HBD                 | 2,03E-05      | Other               |
| 29 | -192,421    | RETN                | <2.22e-16     | Extracellular Space |
| 30 | -186,833    | LINC00937           | <2.22e-16     | Other               |
| 31 | -158,846    | ICOSLG/LOC102723996 | <2.22e-16     | Plasma Membrane     |
| 32 | -156,015    | LINC00937           | <2.22e-16     | Other               |
| 33 | -149,898    | CEBPA               | <2.22e-16     | Nucleus             |
| 34 | -145,835    | PMP22               | <2.22e-16     | Plasma Membrane     |
| 35 | -143,730    | LY86                | <2.22e-16     | Plasma Membrane     |
| 36 | -138,604    | ANPEP               | <2.22e-16     | Plasma Membrane     |
| 37 | -138,237    | LILRB3              | <2.22e-16     | Plasma Membrane     |
| 38 | -127,691    | ZNF503              | <2.22e-16     | Nucleus             |
| 39 | -125,413    | CD14                | <2.22e-16     | Plasma Membrane     |
| 40 | -124,707    | ARHGEF40            | <2.22e-16     | Other               |
| 41 | -120,298    | APBA2               | 3,61E-04      | Cytoplasm           |
| 42 | -118,837    | PTGDS               | <2.22e-16     | Cytoplasm           |
| 43 | -112,249    | PDE2A               | <2.22e-16     | Cytoplasm           |
| 44 | -112,132    | FCRL3               | 1,78E-04      | Other               |
| 45 | -111,023    | TMEM176A            | 4,74E-06      | Other               |
| 46 | -109,820    | NCF2                | <2.22e-16     | Cytoplasm           |
| 47 | -106,864    | CD302               | <2.22e-16     | Plasma Membrane     |
| 48 | -98,452     | IRS2                | <2.22e-16     | Cytoplasm           |
| 49 | -96,054     | KBTD11              | 9,15E-05      | Other               |

|     |         |                   |           |                     |
|-----|---------|-------------------|-----------|---------------------|
| 50  | -95,044 | CDA               | <2.22e-16 | Nucleus             |
| 51  | -91,549 | PCDH1             | <2.22e-16 | Plasma Membrane     |
| 52  | -88,001 | ADAMTS10          | <2.22e-16 | Extracellular Space |
| 53  | -87,120 | CSF2RA            | <2.22e-16 | Plasma Membrane     |
| 54  | -84,367 | FAM117B           | <2.22e-16 | Other               |
| 55  | -83,760 | LINC00173         | <2.22e-16 | Other               |
| 56  | -83,736 | PLXDC2            | 5,95E-05  | Extracellular Space |
| 57  | -81,654 | HBA1/HBA2         | 1,09E-05  | Extracellular Space |
| 58  | -81,514 | IFIT2             | 1,49E-05  | Cytoplasm           |
| 59  | -79,707 | C1orf162          | 4,72E-03  | Other               |
| 60  | -78,783 | SLC11A1           | <2.22e-16 | Plasma Membrane     |
| 61  | -78,393 | FCGRT             | <2.22e-16 | Plasma Membrane     |
| 62  | -77,886 | DOK3              | <2.22e-16 | Cytoplasm           |
| 63  | -77,447 | ID1               | <2.22e-16 | Nucleus             |
| 64  | -76,964 | KCTD12            | <2.22e-16 | Plasma Membrane     |
| 65  | -76,289 | RAB20             | <2.22e-16 | Cytoplasm           |
| 66  | -76,130 | CFD               | <2.22e-16 | Extracellular Space |
| 67  | -74,522 | GPR183            | <2.22e-16 | Plasma Membrane     |
| 68  | -71,840 | CST3              | 7,73E-06  | Extracellular Space |
| 69  | -70,819 | BST1              | <2.22e-16 | Plasma Membrane     |
| 70  | -70,366 | ADAP2             | <2.22e-16 | Cytoplasm           |
| 71  | -69,763 | PRKAG2-AS1        | 2,01E-05  | Other               |
| 72  | -69,068 | CD302             | <2.22e-16 | Plasma Membrane     |
| 73  | -68,667 | EMP1              | 6,12E-05  | Plasma Membrane     |
| 74  | -67,132 | GPRC5C            | <2.22e-16 | Plasma Membrane     |
| 75  | -65,953 | HP                | <2.22e-16 | Extracellular Space |
| 76  | -65,247 | CXCL2             | <2.22e-16 | Extracellular Space |
| 77  | -64,235 | LRG1              | <2.22e-16 | Extracellular Space |
| 78  | -63,194 | CST5              | <2.22e-16 | Cytoplasm           |
| 79  | -61,992 | CKAP4             | 3,23E-04  | Cytoplasm           |
| 80  | -58,503 | NOL4L             | <2.22e-16 | Other               |
| 81  | -58,395 | ZNF385A           | <2.22e-16 | Nucleus             |
| 82  | -57,779 | CLEC10A           | <2.22e-16 | Plasma Membrane     |
| 83  | -56,044 | LINC00565         | <2.22e-16 | Other               |
| 84  | -55,169 | LOC102724428/SIK1 | <2.22e-16 | Nucleus             |
| 85  | -53,975 | KCTD12            | <2.22e-16 | Plasma Membrane     |
| 86  | -53,692 | CACNA2D2          | <2.22e-16 | Plasma Membrane     |
| 87  | -53,489 | NUAK2             | 2,85E-06  | Other               |
| 88  | -51,365 | OSCAR             | <2.22e-16 | Plasma Membrane     |
| 89  | -50,308 | GLT1D1            | <2.22e-16 | Extracellular Space |
| 90  | -49,730 | CD33              | 6,82E-04  | Plasma Membrane     |
| 91  | -49,624 | THBS1             | <2.22e-16 | Extracellular Space |
| 92  | -49,037 | NFE2              | 3,21E-06  | Nucleus             |
| 93  | -47,911 | LOC100505585      | <2.22e-16 | Other               |
| 94  | -47,869 | SH2B2             | <2.22e-16 | Cytoplasm           |
| 95  | -47,700 | B3GNT5            | <2.22e-16 | Cytoplasm           |
| 96  | -46,288 | IFIT2             | <2.22e-16 | Cytoplasm           |
| 97  | -46,269 | NDRG2             | <2.22e-16 | Cytoplasm           |
| 98  | -46,175 | CXCL16            | <2.22e-16 | Extracellular Space |
| 99  | -44,885 | GP1BB             | <2.22e-16 | Plasma Membrane     |
| 100 | -43,877 | LGR6              | <2.22e-16 | Plasma Membrane     |
