# Supplementary material for: Fully automated expansion and activation of clinical-grade natural killer cells for adoptive immunotherapy
Source: PubMed Central journal article supplement — Cytotherapy. Author manuscript; Available in PMC 2022 Jan 4. (PMC8725994; doi:10.1016/j.jcyt.2015.03.611), 2015-05
Supplement: NIHMS1730825-supplement-3.pdf [file NIHMS1730825-supplement-3.pdf]

**Supplementary table 3** 100 most up-regulated genes after automated NK cell expansion in comparison to freshly isolated NK cells.

|    | Fold Change | Gene      | Tukey p value | Location            |
|----|-------------|-----------|---------------|---------------------|
| 1  | 703,033     | MAL       | <2.22e-16     | Plasma Membrane     |
| 2  | 458,605     | UBE2T     | <2.22e-16     | Nucleus             |
| 3  | 423,864     | CCNA2     | <2.22e-16     | Nucleus             |
| 4  | 411,374     | PBK       | <2.22e-16     | Cytoplasm           |
| 5  | 317,429     | CDCA3     | <2.22e-16     | Cytoplasm           |
| 6  | 285,719     | KIF2C     | <2.22e-16     | Nucleus             |
| 7  | 275,122     | CDKN3     | <2.22e-16     | Cytoplasm           |
| 8  | 263,140     | TOP2A     | <2.22e-16     | Nucleus             |
| 9  | 260,271     | ASPM      | <2.22e-16     | Nucleus             |
| 10 | 253,148     | AURKA     | <2.22e-16     | Nucleus             |
| 11 | 252,553     | ZBTB32    | 2,53E-05      | Nucleus             |
| 12 | 246,873     | CCNB2     | <2.22e-16     | Cytoplasm           |
| 13 | 240,562     | KIF15     | <2.22e-16     | Nucleus             |
| 14 | 234,212     | LINC00892 | <2.22e-16     | Other               |
| 15 | 227,537     | UBE2C     | <2.22e-16     | Cytoplasm           |
| 16 | 226,337     | CDK1      | <2.22e-16     | Nucleus             |
| 17 | 211,701     | TPX2      | <2.22e-16     | Nucleus             |
| 18 | 204,710     | KIF11     | <2.22e-16     | Nucleus             |
| 19 | 197,971     | CCNB1     | <2.22e-16     | Cytoplasm           |
| 20 | 182,833     | RMI2      | <2.22e-16     | Nucleus             |
| 21 | 180,982     | FOXM1     | <2.22e-16     | Nucleus             |
| 22 | 166,920     | MELK      | <2.22e-16     | Cytoplasm           |
| 23 | 165,182     | EPDR1     | <2.22e-16     | Nucleus             |
| 24 | 164,645     | CENPM     | <2.22e-16     | Cytoplasm           |
| 25 | 157,656     | RAD51     | <2.22e-16     | Nucleus             |
| 26 | 157,368     | TROAP     | <2.22e-16     | Cytoplasm           |
| 27 | 154,096     | CDCA2     | <2.22e-16     | Nucleus             |
| 28 | 152,739     | SLC27A2   | <2.22e-16     | Cytoplasm           |
| 29 | 150,267     | DPP4      | <2.22e-16     | Plasma Membrane     |
| 30 | 146,657     | ZWINT     | <2.22e-16     | Nucleus             |
| 31 | 137,438     | CENPF     | <2.22e-16     | Nucleus             |
| 32 | 137,217     | AURKB     | <2.22e-16     | Nucleus             |
| 33 | 137,033     | CCNB1     | <2.22e-16     | Cytoplasm           |
| 34 | 134,626     | GIN52     | <2.22e-16     | Nucleus             |
| 35 | 128,181     | CKAP2L    | <2.22e-16     | Cytoplasm           |
| 36 | 125,920     | CDC20     | <2.22e-16     | Nucleus             |
| 37 | 124,399     | HMMR      | <2.22e-16     | Plasma Membrane     |
| 38 | 122,809     | HJURP     | <2.22e-16     | Nucleus             |
| 39 | 119,892     | CD70      | <2.22e-16     | Extracellular Space |
| 40 | 119,585     | CCR5      | <2.22e-16     | Plasma Membrane     |
| 41 | 119,584     | MKI67     | <2.22e-16     | Nucleus             |
| 42 | 118,934     | ZWINT     | <2.22e-16     | Nucleus             |
| 43 | 116,800     | DEPDC1    | <2.22e-16     | Nucleus             |
| 44 | 116,472     | UCHL1     | <2.22e-16     | Cytoplasm           |
| 45 | 113,602     | UHRF1     | <2.22e-16     | Nucleus             |
| 46 | 111,406     | AFAP1L2   | <2.22e-16     | Cytoplasm           |
| 47 | 110,162     | SPC24     | <2.22e-16     | Cytoplasm           |
| 48 | 109,654     | HIST2H3A  | <2.22e-16     | Nucleus             |
| 49 | 107,572     | CENPA     | <2.22e-16     | Nucleus             |

|     |         |          |           |                     |
|-----|---------|----------|-----------|---------------------|
| 50  | 107,358 | RRM2     | <2.22e-16 | Nucleus             |
| 51  | 106,502 | CIT      | <2.22e-16 | Cytoplasm           |
| 52  | 103,097 | MKI67    | <2.22e-16 | Nucleus             |
| 53  | 101,171 | BIRC5    | <2.22e-16 | Cytoplasm           |
| 54  | 101,078 | SLCO4A1  | <2.22e-16 | Plasma Membrane     |
| 55  | 99,586  | PERP     | <2.22e-16 | Plasma Membrane     |
| 56  | 98,773  | KIAA0101 | <2.22e-16 | Nucleus             |
| 57  | 98,605  | DTL      | <2.22e-16 | Nucleus             |
| 58  | 97,274  | NUSAP1   | <2.22e-16 | Nucleus             |
| 59  | 95,353  | RAD54L   | <2.22e-16 | Nucleus             |
| 60  | 93,735  | EXO1     | <2.22e-16 | Nucleus             |
| 61  | 89,401  | TYMS     | <2.22e-16 | Nucleus             |
| 62  | 87,635  | BUB1B    | <2.22e-16 | Nucleus             |
| 63  | 86,350  | IQGAP3   | <2.22e-16 | Plasma Membrane     |
| 64  | 85,654  | DHCR24   | <2.22e-16 | Cytoplasm           |
| 65  | 85,623  | POLQ     | <2.22e-16 | Nucleus             |
| 66  | 84,553  | TTK      | <2.22e-16 | Nucleus             |
| 67  | 80,515  | KIF23    | <2.22e-16 | Cytoplasm           |
| 68  | 78,335  | ESPL1    | <2.22e-16 | Nucleus             |
| 69  | 78,297  | CCDC34   | <2.22e-16 | Other               |
| 70  | 78,202  | HIST1H1B | <2.22e-16 | Nucleus             |
| 71  | 76,309  | C16orf59 | <2.22e-16 | Other               |
| 72  | 74,508  | NPDC1    | <2.22e-16 | Extracellular Space |
| 73  | 74,242  | CENPQ    | <2.22e-16 | Other               |
| 74  | 72,221  | PKMYT1   | <2.22e-16 | Cytoplasm           |
| 75  | 70,352  | ASF1B    | <2.22e-16 | Nucleus             |
| 76  | 66,157  | KDELCL1  | <2.22e-16 | Cytoplasm           |
| 77  | 65,282  | E2F7     | <2.22e-16 | Nucleus             |
| 78  | 65,112  | CDCA8    | <2.22e-16 | Nucleus             |
| 79  | 64,652  | CXCR6    | <2.22e-16 | Plasma Membrane     |
| 80  | 63,789  | CDCA5    | <2.22e-16 | Cytoplasm           |
| 81  | 63,207  | CENPM    | <2.22e-16 | Cytoplasm           |
| 82  | 61,589  | E2F2     | <2.22e-16 | Nucleus             |
| 83  | 60,820  | CDC45    | <2.22e-16 | Nucleus             |
| 84  | 60,691  | CDT1     | <2.22e-16 | Nucleus             |
| 85  | 60,059  | PYCR1    | <2.22e-16 | Cytoplasm           |
| 86  | 57,215  | KIF23    | <2.22e-16 | Cytoplasm           |
| 87  | 56,323  | GTSE1    | <2.22e-16 | Cytoplasm           |
| 88  | 55,743  | DIAPH3   | <2.22e-16 | Cytoplasm           |
| 89  | 55,650  | SGOL2    | <2.22e-16 | Nucleus             |
| 90  | 54,904  | BRCA1    | <2.22e-16 | Nucleus             |
| 91  | 54,481  | LAG3     | 2,75E-04  | Plasma Membrane     |
| 92  | 53,779  | MMP25    | <2.22e-16 | Plasma Membrane     |
| 93  | 53,246  | DSCC1    | <2.22e-16 | Nucleus             |
| 94  | 53,221  | RNF207   | <2.22e-16 | Other               |
| 95  | 53,150  | LTB      | <2.22e-16 | Extracellular Space |
| 96  | 52,576  | CDKN2A   | <2.22e-16 | Nucleus             |
| 97  | 51,656  | NDFIP2   | <2.22e-16 | Cytoplasm           |
| 98  | 51,602  | DHFR     | <2.22e-16 | Nucleus             |
| 99  | 50,315  | TK1      | <2.22e-16 | Cytoplasm           |
| 100 | 49,486  | CENPE    | <2.22e-16 | Nucleus             |
